# Supplementary material for: Exposure to Titanium Dioxide Nanoparticles Leads to Specific Disorders of Spermatid Elongation via Multiple Metabolic Pathways in Drosophila Testes
Source: PubMed Central journal article supplement — ACS Omega. 2024 May 20;9(22):23613–23. doi: 10.1021/acsomega.4c01140 (PMC11154731; doi:10.1021/acsomega.4c01140), 2024-05-20
Supplement: ao4c01140_si_001.pdf [file ao4c01140_si_001.pdf]

## Supplementary materials

### **Exposure to titanium dioxide nanoparticles leads to specific disorders of spermatid elongation via multiple metabolic pathways in *Drosophila* testes**

Xinmeng Cheng<sup>1,#</sup>, Ting Jiang<sup>1,#</sup>, Qiuru Huang<sup>1,#</sup>, Li Ji<sup>1</sup>, Jiaxin Li<sup>1</sup>, Xiuwen Kong<sup>1</sup>, Xiaoqi Zhu<sup>1</sup>, Xuxin He<sup>1</sup>, Xiaonan Deng<sup>1</sup>, Tong Wu<sup>1</sup>, Hao Yu<sup>1</sup>, Yi Shi<sup>1</sup>, Lin Liu<sup>1</sup>, Xinyuan Zhao<sup>2,\*</sup>, Xiaorong Wang<sup>3,4,5,\*</sup>, Hao Chen<sup>1,\*</sup>, Jun Yu<sup>1,\*</sup>

<sup>1</sup> Institute of Reproductive Medicine, School of Medicine, Nantong University, Nantong 226001, China.

<sup>2</sup> Department of Occupational Medicine and Environmental Toxicology, Nantong Key Laboratory of Environmental Toxicology, School of Public Health, Nantong University, Nantong 226019, China.

<sup>3</sup> Center for Reproductive Medicine, Affiliated Maternity and Child Health Care Hospital of Nantong University, Nantong 226018, China

<sup>4</sup> Nantong Institute of Genetics and Reproductive Medicine, Affiliated Maternity and Child Healthcare Hospital of Nantong University, Nantong 226018, China

<sup>5</sup> Nantong Key Laboratory of Genetics and Reproductive Medicine, Nantong 226018, China

# These authors contributed equally to this work.

\*Correspondence to: Jun Yu, Email: yujun9117@126.com; or to Hao Chen, Email: chen hao@ntu.edu.cn; or to Xiaorong Wang, Email: xr0104@ntu.edu.cn; or to Xinyuan Zhao, Email: zhaoxinyuan@ntu.edu.cn.

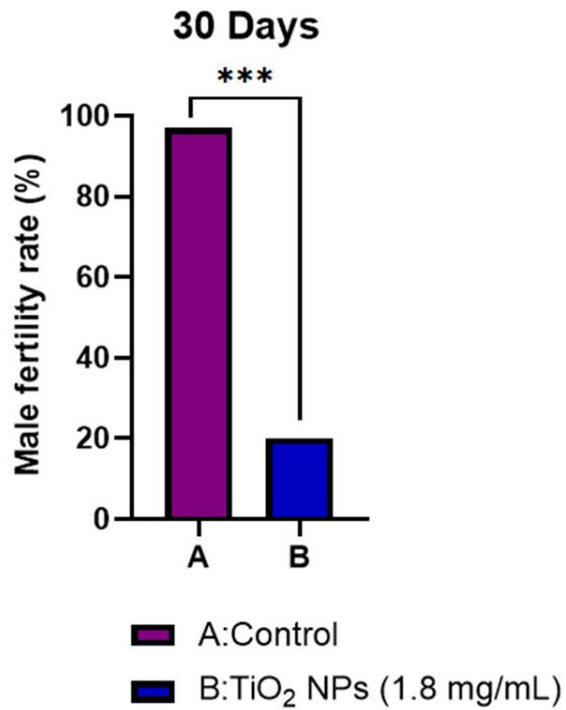

**Figure S1. Male fertility testing between the control and TiO<sub>2</sub> NPs (1.8 mg/mL) groups.** Two-to-three day males were exposed with or without TiO<sub>2</sub> NPs for a duration of 30 days. A single male and three virgin females were cohabited in a tube at ambient temperature. Chi-square test was used to evaluate for ratio results. \*\*\* P < 0.001.

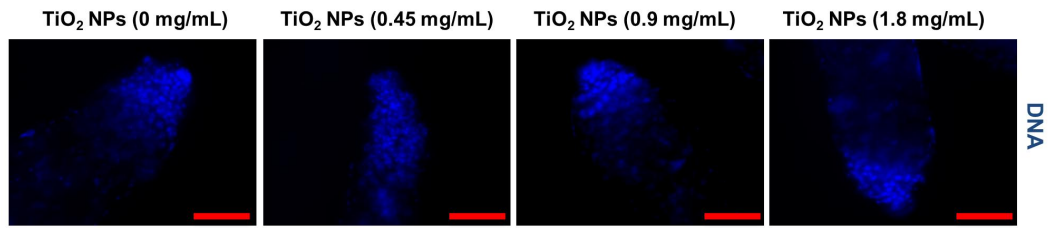

**Figure S2. Testicular phenotype analysis for TiO<sub>2</sub> NPs exposure at the apex of testes. DNA was stained with Hoechst (blue). Scale bar: 50 uM.**

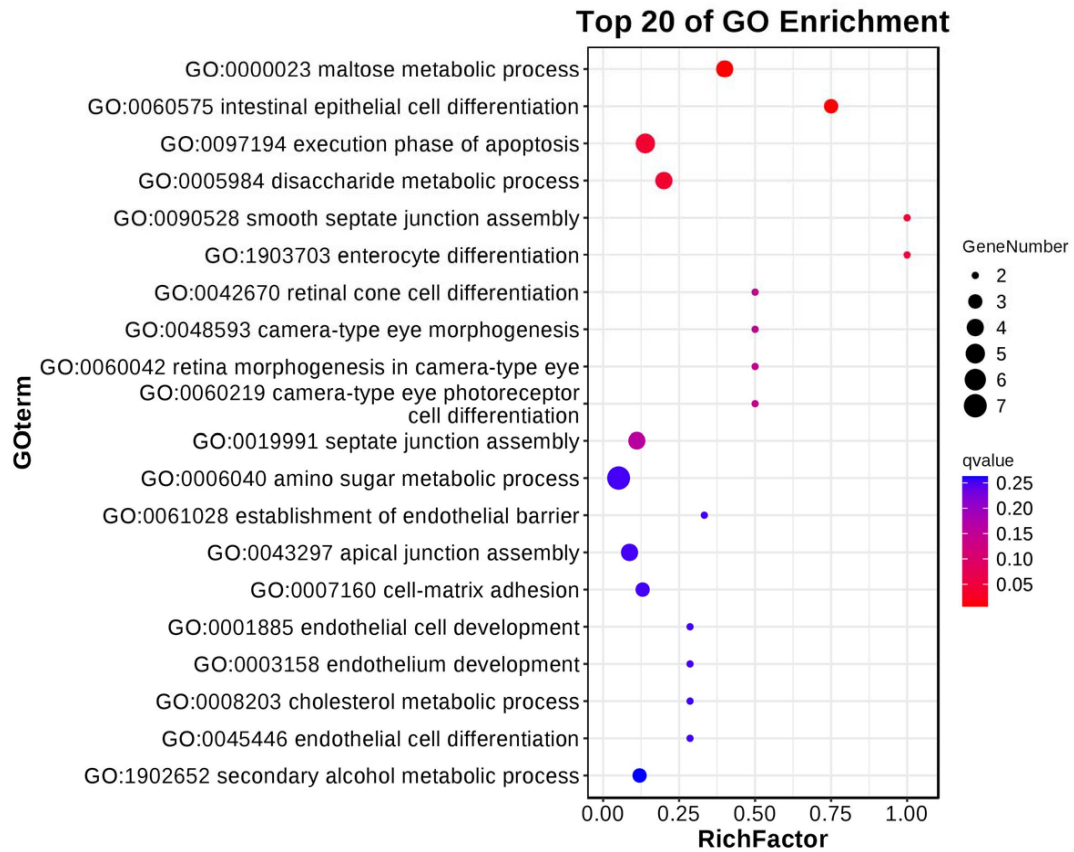

**Figure S3. Top20 of GO enrichment for biological processes.** Analysis was performed for DEGs between the control and TiO<sub>2</sub> NPs (1.8 mg/mL) groups.

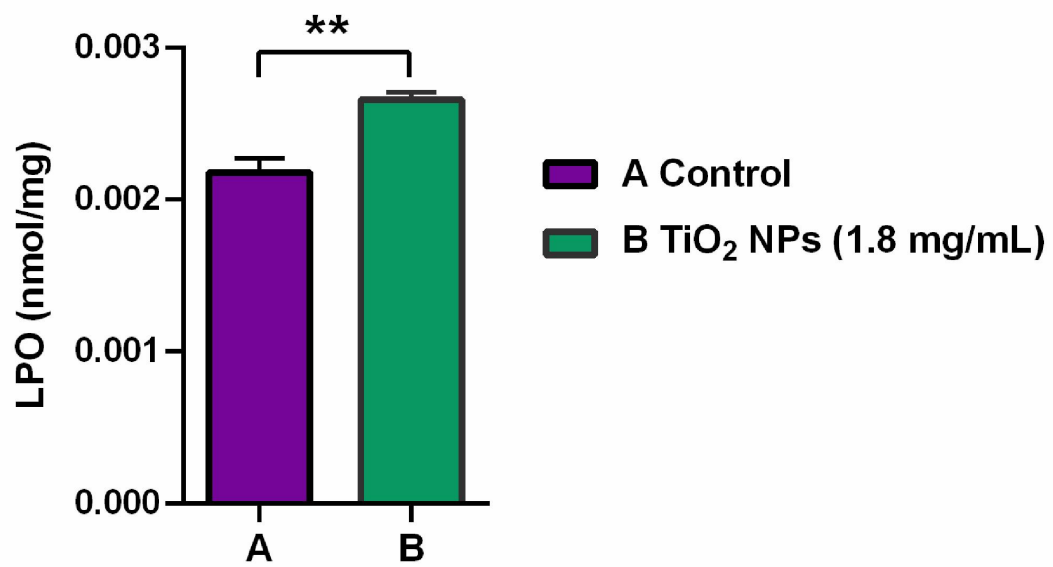

**Figure S4. LPO level between the control and TiO<sub>2</sub> NPs (1.8 mg/mL) groups.** Statistical differences were compared to control group. \*\* P<0.01.

**Table S1. Antibodies used for immunofluorescence staining.**

| <b>Antigen</b> | <b>Source</b> | <b>Company</b>              | <b>Dilution</b> |
|----------------|---------------|-----------------------------|-----------------|
| Orb            | Mouse         | DSHB                        | 1:50            |
| De-cad         | Rat           | DSHB                        | 1:15            |
| Tj             | Mouse         | a gift from Prof. Chao Tong | 1:1000          |
| LamC           | Mouse         | DSHB                        | 1:100           |
| LamDm0         | Mouse         | DSHB                        | 1:100           |

**Table S2. Detailed primer information used for qRT-PCR analysis.**

| <b>Gene</b>    | <b>Forward (5'-3')</b>    | <b>Reverse (5'-3')</b>    |
|----------------|---------------------------|---------------------------|
| <i>Acp98AB</i> | AATCCTGTTCTTAGCCGCATTGG   | CCTCGTCATCCTTTGATAGTGTGTC |
| <i>Mst57Da</i> | CTTTGCTGGTTGTTCTGGCTTTG   | CTTGGCACCGATGACGATGAC     |
| <i>GstD8</i>   | ATAATGACAGCCAAGGCCCTTG    | ACAAACTCCGGCTTCAGTTGC     |
| <i>Mal-A1</i>  | CTACACGCAGCACATCTATACACAG | TCCGTCATCAGCAGCCTCTTATC   |
| <i>Mal-A2</i>  | AACCGAACTTTGAATGCCAATTACC | CCATAGCGATAACCAAGCGACAG   |
| <i>tobi</i>    | CCCACAGGCTATCCCGATGAG     | GCTTGGCGAAGTCACGAACC      |
| <i>GstD2</i>   | AAGAAGCGTGCCGTGATCAAC     | TCCAAACGCGGTTTTGATTCTC    |
| <i>Gapdh</i>   | GTGGTGAACGGCCAGAAGAT      | GCCTTGTCAATGGTGGTGAA      |

**Table S3. TiO2 NPs exposure mediated DEGs.**

| ID          | Ctrl_mean   | TiO2_mean   | log2(fc)     | PValue   | FDR      | Symbol   |
|-------------|-------------|-------------|--------------|----------|----------|----------|
| FBgn0033788 | 243.6193333 | 723.3193333 | 1.570004085  | 3.52E-53 | 4.96E-49 | CG13323  |
| FBgn0032835 | 13.01966667 | 47.534      | 1.868267297  | 3.52E-43 | 2.48E-39 | CG16772  |
| FBgn0051974 | 7.249       | 24.619      | 1.763918268  | 3.10E-39 | 1.46E-35 | CG31974  |
| FBgn0033787 | 14.97233333 | 53.94133333 | 1.84909211   | 6.43E-34 | 2.27E-30 | CG13321  |
| FBgn0027341 | 21.65533333 | 50.85733333 | 1.231733438  | 2.75E-33 | 7.77E-30 | Gfat1    |
| FBgn0032124 | 1.404333333 | 8.308       | 2.564615801  | 4.47E-33 | 1.05E-29 | CG17855  |
| FBgn0263322 | 42.62633333 | 11.78733333 | -1.85450759  | 2.97E-30 | 5.99E-27 | CG43403  |
| MSTRG.5004  | 7.186333333 | 1.668666667 | -2.106560065 | 2.85E-29 | 5.02E-26 | --       |
| FBgn0038353 | 30.33233333 | 84.15833333 | 1.472249651  | 5.86E-29 | 9.18E-26 | CG5399   |
| FBgn0051004 | 9.118       | 26.32033333 | 1.529388446  | 1.33E-26 | 1.87E-23 | mesh     |
| FBgn0265185 | 6.087333333 | 25.43666667 | 2.063027353  | 1.64E-26 | 2.11E-23 | CG44250  |
| MSTRG.13349 | 16.352      | 34.67733333 | 1.084525859  | 5.40E-26 | 6.35E-23 | pol      |
| FBgn0264329 | 136.505     | 66.62266667 | -1.03486879  | 1.13E-25 | 1.13E-22 | CG43788  |
| FBgn0003900 | 7.401666667 | 16.99466667 | 1.199159995  | 6.35E-25 | 5.97E-22 | twi      |
| FBgn0052580 | 1.395       | 0.658666667 | -1.082644676 | 1.00E-24 | 8.31E-22 | Muc14A   |
| FBgn0265186 | 3.361666667 | 10.52466667 | 1.646525958  | 1.21E-23 | 9.01E-21 | CG44251  |
| FBgn0040299 | 0.593       | 2.854666667 | 2.267218285  | 8.35E-23 | 5.61E-20 | Myo28B1  |
| FBgn0036945 | 26.46766667 | 64.493      | 1.284911565  | 8.43E-21 | 4.57E-18 | Ssk      |
| FBgn0031913 | 17.244      | 37.58933333 | 1.124228861  | 1.66E-20 | 8.68E-18 | CG5958   |
| FBgn0264897 | 27.761      | 9.020666667 | -1.621753573 | 2.22E-20 | 1.12E-17 | CG44088  |
| FBgn0035094 | 8.956666667 | 19.223      | 1.101799684  | 5.60E-19 | 2.55E-16 | CG9380   |
| FBgn0085476 | 16.64033333 | 6.301       | -1.401031619 | 1.49E-18 | 6.57E-16 | CG34447  |
| FBgn0011668 | 164.397     | 72.347      | -1.184178873 | 8.53E-18 | 3.54E-15 | Mst57Da  |
| FBgn0031579 | 2.444       | 12.76433333 | 2.384801999  | 1.00E-17 | 4.04E-15 | CG15422  |
| MSTRG.14475 | 6.405333333 | 15.123      | 1.239398805  | 8.26E-17 | 2.99E-14 | pol      |
| MSTRG.14544 | 207.8186667 | 604.9016667 | 1.54137539   | 2.42E-16 | 8.54E-14 | GIP      |
| FBgn0036391 | 2.481333333 | 0.732333333 | -1.760543186 | 2.87E-16 | 9.64E-14 | CG17364  |
| FBgn0039024 | 5.898       | 13.66333333 | 1.212011762  | 2.05E-15 | 5.77E-13 | Nep115   |
| FBgn0030367 | 7.097666667 | 15.22       | 1.100551632  | 6.67E-14 | 1.52E-11 | Cyp311a1 |
| MSTRG.102   | 4.158333333 | 1.994333333 | -1.060098847 | 9.53E-14 | 2.13E-11 | --       |
| FBgn0039299 | 0.331333333 | 3.711666667 | 3.485711896  | 1.56E-13 | 3.29E-11 | CG11854  |
| FBgn0037431 | 28.29666667 | 13.428      | -1.075387672 | 1.87E-13 | 3.88E-11 | CG17917  |
| FBgn0038451 | 7.132666667 | 2.909       | -1.293918257 | 2.94E-13 | 5.76E-11 | CG14893  |
| FBgn0039475 | 1.013       | 7.360333333 | 2.86113693   | 3.96E-13 | 7.54E-11 | CG6277   |
| FBgn0032139 | 1.611       | 6.466       | 2.004917013  | 5.04E-13 | 9.47E-11 | CG13116  |
| FBgn0000527 | 2.418666667 | 6.242       | 1.367796402  | 6.21E-13 | 1.12E-10 | e        |
| FBgn0004431 | 0.302666667 | 7.317       | 4.595450557  | 2.54E-12 | 4.06E-10 | LysX     |
| FBgn0033051 | 3.701333333 | 8.383       | 1.179421562  | 1.25E-11 | 1.83E-09 | Strica   |
| FBgn0039316 | 4.867       | 11.58166667 | 1.2507382    | 2.01E-11 | 2.80E-09 | CG11893  |
| FBgn0033139 | 1.44        | 6.061666667 | 2.073645708  | 2.17E-11 | 2.99E-09 | Tsp42Er  |
| FBgn0004595 | 1.076333333 | 2.565666667 | 1.253208806  | 2.33E-11 | 3.19E-09 | pros     |
| MSTRG.733   | 8.872       | 2.677333333 | -1.728462597 | 3.11E-11 | 4.05E-09 | --       |



|             |             |             |              |          |          |                 |
|-------------|-------------|-------------|--------------|----------|----------|-----------------|
| FBgn0051288 | 9.956666667 | 20.32533333 | 1.029544276  | 3.63E-11 | 4.66E-09 | CG31288         |
| FBgn0031273 | 6.385666667 | 3.065666667 | -1.058636406 | 4.21E-11 | 5.35E-09 | CG2839          |
| FBgn0035875 | 5.012333333 | 1.3         | -1.946970738 | 4.49E-10 | 4.87E-08 | Cpr66Cb         |
| MSTRG.5000  | 22.61       | 11.138      | -1.021470794 | 5.23E-10 | 5.42E-08 | --              |
| FBgn0039342 | 0.405666667 | 4.681333333 | 3.528552828  | 6.83E-10 | 6.70E-08 | CG5107          |
| FBgn0039864 | 11.691      | 5.48        | -1.093150539 | 7.26E-10 | 7.06E-08 | CG11550         |
| FBgn0032435 | 0.59        | 2.851333333 | 2.272849847  | 1.02E-09 | 9.63E-08 | Oatp33Eb        |
| FBgn0030774 | 1.631       | 5.530666667 | 1.761696611  | 1.21E-09 | 1.12E-07 | sphe            |
| FBgn0040318 | 2.529333333 | 5.092333333 | 1.00956968   | 1.81E-09 | 1.57E-07 | HGTX            |
| FBgn0037612 | 1.97        | 4.637333333 | 1.235099802  | 2.18E-09 | 1.88E-07 | CG8112          |
| FBgn0030051 | 2.104666667 | 5.271333333 | 1.324576164  | 2.74E-09 | 2.31E-07 | spirit          |
| FBgn0031970 | 2.214       | 0.612333333 | -1.854266096 | 4.72E-09 | 3.78E-07 | CG7227          |
| FBgn0038466 | 1.906       | 5.069333333 | 1.411247912  | 5.69E-09 | 4.51E-07 | CG8907          |
| FBgn0002569 | 4.317666667 | 11.338      | 1.392842401  | 6.28E-09 | 4.92E-07 | Mal-A2          |
| FBgn0011653 | 3.246666667 | 1.476666667 | -1.136615074 | 6.56E-09 | 5.08E-07 | mas             |
| FBgn0024361 | 3.190333333 | 10.156      | 1.670553227  | 7.29E-09 | 5.56E-07 | Tsp2A           |
| FBgn0052195 | 3.851       | 9.796666667 | 1.34705783   | 8.03E-09 | 5.96E-07 | CG32195         |
| FBgn0036479 | 1.204666667 | 3.154666667 | 1.388853567  | 1.44E-08 | 9.69E-07 | CG13458         |
| FBgn0038082 | 0.092333333 | 1.900333333 | 4.36325712   | 1.74E-08 | 1.15E-06 | Ugt37A2         |
| FBgn0033388 | 2.073333333 | 4.878       | 1.234337678  | 2.48E-08 | 1.58E-06 | CG8046          |
| FBgn0005664 | 0.389       | 2.091333333 | 2.426580968  | 2.69E-08 | 1.68E-06 | Crys            |
| FBgn0036419 | 14.22166667 | 36.721      | 1.3685148    | 3.40E-08 | 2.04E-06 | CG13482         |
| FBgn0032373 | 1.242       | 3.775       | 1.603811471  | 3.93E-08 | 2.33E-06 | Vha100-5        |
| FBgn0040069 | 0.037666667 | 1.485       | 5.301030754  | 4.36E-08 | 2.56E-06 | vanin-like      |
| FBgn0034286 | 0.214       | 1.076666667 | 2.330888962  | 6.80E-08 | 3.82E-06 | dpr13           |
| MSTRG.3079  | 0.983333333 | 3.109666667 | 1.661007489  | 7.06E-08 | 3.95E-06 | --              |
| FBgn0031470 | 7.245       | 18.014      | 1.314060972  | 7.82E-08 | 4.26E-06 | CG18557         |
| FBgn0035557 | 4.102333333 | 8.816       | 1.103679502  | 1.11E-07 | 5.86E-06 | CG11353         |
| FBgn0034664 | 3.023       | 12.03866667 | 1.993622732  | 1.12E-07 | 5.87E-06 | CG4377          |
| FBgn0031412 | 3.068666667 | 8.017       | 1.385450532  | 1.34E-07 | 6.86E-06 | CG16995         |
| FBgn0032074 | 3.612333333 | 8.992333333 | 1.31576449   | 1.51E-07 | 7.64E-06 | Tsp29Fa         |
| FBgn0266347 | 0.889333333 | 2.612333333 | 1.55454283   | 1.65E-07 | 8.26E-06 | nAChRalp<br>ha4 |
| FBgn0037754 | 0.502333333 | 1.506333333 | 1.58432414   | 1.94E-07 | 9.41E-06 | CG8500          |
| FBgn0039081 | 1.908333333 | 5.08        | 1.412515305  | 2.63E-07 | 1.24E-05 | Irk2            |
| MSTRG.9887  | 1.454666667 | 0.475       | -1.614689182 | 2.63E-07 | 1.24E-05 | --              |
| FBgn0033733 | 9.079666667 | 18.19       | 1.002434304  | 2.92E-07 | 1.35E-05 | CG8834          |
| FBgn0013773 | 2.563333333 | 5.390333333 | 1.072353393  | 3.31E-07 | 1.51E-05 | Cyp6a22         |
| FBgn0034290 | 14.644      | 31.90066667 | 1.123276895  | 3.51E-07 | 1.58E-05 | CG5773          |
| FBgn0040732 | 10.44733333 | 4.832       | -1.112442384 | 4.09E-07 | 1.77E-05 | CG16926         |
| FBgn0030775 | 3.389333333 | 10.53166667 | 1.63566033   | 4.97E-07 | 2.13E-05 | CG9673          |
| MSTRG.8989  | 3.356       | 0.711666667 | -2.237469147 | 5.31E-07 | 2.21E-05 | --              |
| FBgn0034187 | 0.828666667 | 2.722       | 1.715803271  | 5.43E-07 | 2.25E-05 | CG6967          |
| FBgn0037174 | 1.079       | 3.543666667 | 1.715548039  | 5.53E-07 | 2.29E-05 | CG14457         |

|             |             |             |              |          |          |            |
|-------------|-------------|-------------|--------------|----------|----------|------------|
| MSTRG.13006 | 1.943       | 0.333       | -2.544691819 | 5.95E-07 | 2.41E-05 | --         |
| FBgn0028950 | 4.707333333 | 10.296      | 1.129102038  | 6.04E-07 | 2.44E-05 | CG15255    |
| FBgn0028518 | 0.560666667 | 2.260666667 | 2.011533079  | 6.09E-07 | 2.45E-05 | CG18480    |
| FBgn0004649 | 1.003666667 | 0.442       | -1.183161933 | 6.28E-07 | 2.50E-05 | yl         |
| FBgn0261090 | 2.003333333 | 0.968       | -1.049323538 | 7.16E-07 | 2.81E-05 | Sybeta     |
| FBgn0054040 | 1.964333333 | 13.07966667 | 2.735214104  | 7.24E-07 | 2.83E-05 | CG34040    |
| FBgn0033124 | 0.376       | 2.984333333 | 2.988604119  | 7.65E-07 | 2.96E-05 | Tsp42Ec    |
| FBgn0036321 | 0.470666667 | 1.47        | 1.643038567  | 8.80E-07 | 3.32E-05 | CG14120    |
| FBgn0039232 | 4.778333333 | 1.867333333 | -1.355528016 | 2.80E-06 | 9.16E-05 | sosie      |
| FBgn0037386 | 2.166333333 | 5.723333333 | 1.401600386  | 2.82E-06 | 9.19E-05 | CG1208     |
| FBgn0031097 | 2.832       | 5.964666667 | 1.07462025   | 2.83E-06 | 9.20E-05 | obst-A     |
| FBgn0051106 | 1.592333333 | 4.804333333 | 1.593193875  | 3.46E-06 | 0.000109 | CG31106    |
|             |             |             |              |          | 382      |            |
| FBgn0032601 | 2.832       | 5.803       | 1.034977663  | 3.51E-06 | 0.000110 | yellow-b   |
|             |             |             |              |          | 168      |            |
| FBgn0035360 | 1.645333333 | 5.279       | 1.681884772  | 3.58E-06 | 0.000111 | CG1246     |
|             |             |             |              |          | 937      |            |
| MSTRG.4537  | 0.665333333 | 3.224333333 | 2.276851678  | 3.67E-06 | 0.000113 | --         |
|             |             |             |              |          | 606      |            |
| FBgn0035476 | 1.419333333 | 3.892333333 | 1.455421816  | 5.44E-06 | 0.000159 | CG12766    |
|             |             |             |              |          | 087      |            |
| FBgn0263081 | 5.403666667 | 14.03133333 | 1.37664152   | 5.49E-06 | 0.000159 | CG43349    |
|             |             |             |              |          | 862      |            |
| FBgn0034292 | 0.039666667 | 2.508       | 5.98246637   | 5.62E-06 | 0.000162 | CG5767     |
|             |             |             |              |          | 221      |            |
| FBgn0036367 | 1.028333333 | 3.725333333 | 1.857061531  | 6.24E-06 | 0.000176 | CG10116    |
|             |             |             |              |          | 651      |            |
| FBgn0010357 | 0.298       | 31.997      | 6.746480505  | 8.28E-06 | 0.000228 | betaTry    |
|             |             |             |              |          | 422      |            |
| FBgn0015946 | 1.953666667 | 4.169333333 | 1.093632382  | 8.60E-06 | 0.000235 | grim       |
|             |             |             |              |          | 899      |            |
| FBgn0033592 | 1.188666667 | 5.042333333 | 2.084747291  | 9.25E-06 | 0.000249 | CG13215    |
|             |             |             |              |          | 692      |            |
| FBgn0003382 | 0.490666667 | 0.146       | -1.748774896 | 1.11E-05 | 0.000292 | sha        |
|             |             |             |              |          | 124      |            |
| FBgn0015035 | 0.348666667 | 1.479666667 | 2.085351857  | 1.12E-05 | 0.000293 | Cyp4e3     |
|             |             |             |              |          | 681      |            |
| FBgn0262613 | 3.488666667 | 9.473666667 | 1.441247153  | 1.27E-05 | 0.000326 | CG43139    |
|             |             |             |              |          | 654      |            |
| FBgn0033215 | 0.254       | 1.377       | 2.438628157  | 1.35E-05 | 0.000346 | Dgat2      |
|             |             |             |              |          | 051      |            |
| FBgn0259230 | 0.001       | 0.808       | 9.658211483  | 1.63E-05 | 0.000404 | lectin-22C |
|             |             |             |              |          | 409      |            |
| FBgn0034717 | 1.363666667 | 2.899666667 | 1.088396027  | 1.95E-05 | 0.000472 | CG5819     |

|             |             |             |              |          |          |            |                 |
|-------------|-------------|-------------|--------------|----------|----------|------------|-----------------|
|             |             |             |              |          |          | 891        |                 |
| FBgn0262621 | 13.076      | 5.553666667 | -1.235408788 | 2.35E-05 | 0.000550 | 923        | CG43145         |
| FBgn0034662 | 1.589       | 5.457333333 | 1.780077041  | 2.57E-05 | 0.000584 | 248        | CG13492         |
| FBgn0036495 | 8.563333333 | 3.546       | -1.271979948 | 2.61E-05 | 0.000591 | 351        | CG33259         |
| FBgn0031146 | 4.269       | 1.522333333 | -1.487613874 | 2.62E-05 | 0.000592 | 095        | CG15449         |
| MSTRG.8728  | 3.292333333 | 1.462666667 | -1.170509384 | 2.63E-05 | 0.000593 | 233        | --              |
| FBgn0002570 | 23.99766667 | 105.6063333 | 2.137730315  | 2.84E-05 | 0.000628 | 682        | Mal-A1          |
| FBgn0053236 | 2.307333333 | 0.586333333 | -1.976433459 | 2.91E-05 | 0.000640 | 964        | Ste:CG33<br>236 |
| FBgn0265538 | 40.11633333 | 16.785      | -1.257017211 | 3.06E-05 | 0.000666 | 495        | CG44388         |
| FBgn0039087 | 0.786       | 2.041666667 | 1.377146126  | 4.26E-05 | 0.000875 | 77         | Ugt303B2        |
| FBgn0033789 | 2.162666667 | 8.102666667 | 1.905585472  | 4.32E-05 | 0.000885 | 912        | CG13324         |
| FBgn0028853 | 0.017333333 | 1.047333333 | 5.917027747  | 5.71E-05 | 0.001116 | 962        | CG15263         |
| FBgn0042102 | 0.843666667 | 2.150333333 | 1.349815309  | 5.82E-05 | 0.001136 | 729        | CG18745         |
| FBgn0033659 | 1.689666667 | 5.766       | 1.770832174  | 6.01E-05 | 0.001164 | 511        | Damm            |
| FBgn0053127 | 2.865       | 7.724333333 | 1.430875284  | 7.65E-05 | 0.001447 | 431        | CG33127         |
| FBgn0039086 | 0.269666667 | 1.087       | 2.011102833  | 7.85E-05 | 0.001476 | 929        | Ugt303B1        |
| FBgn0022700 | 0.682       | 2.516       | 1.883288278  | 8.35E-05 | 0.001554 | 921        | Cht4            |
| FBgn0038292 | 1.988333333 | 10.64233333 | 2.420182954  | 8.70E-05 | 0.001605 | 081        | CG3987          |
| FBgn0031580 | 2.235333333 | 7.620666667 | 1.76942723   | 9.14E-05 | 0.001672 | 856        | CG15423         |
| FBgn0261675 | 0.202333333 | 0.972333333 | 2.264716965  | 9.28E-05 | 0.001688 | 4          | Npc1b           |
| FBgn0052054 | 0.275333333 | 1.188       | 2.10928365   | 0.000102 | 0.001822 | 5<br>252   | CG32054         |
| MSTRG.8717  | 1.071       | 0.092       | -3.541180809 | 0.000109 | 0.001932 | 655<br>399 | --              |
| FBgn0038958 | 1.486666667 | 0.456       | -1.70497548  | 0.000109 | 0.001934 |            | CG13857         |

|             |             |             |              |          |          |          |
|-------------|-------------|-------------|--------------|----------|----------|----------|
|             |             |             |              | 933      | 642      |          |
| MSTRG.3196  | 5.053       | 1.505333333 | -1.747057195 | 0.000111 | 0.001948 | --       |
|             |             |             |              | 542      | 594      |          |
| FBgn0035583 | 5.63        | 11.51733333 | 1.032599894  | 0.000122 | 0.002110 | CG13704  |
|             |             |             |              | 626      | 844      |          |
| FBgn0038845 | 0.781333333 | 2.328666667 | 1.575494073  | 0.000126 | 0.002155 | Alp5     |
|             |             |             |              | 6        | 571      |          |
| FBgn0040001 | 0.851       | 0.394333333 | -1.109743464 | 0.000143 | 0.002414 | FASN3    |
|             |             |             |              | 88       | 572      |          |
| FBgn0037676 | 0.081666667 | 0.561       | 2.780181522  | 0.000144 | 0.002414 | CG8861   |
|             |             |             |              | 039      | 572      |          |
| FBgn0043471 | 2.159       | 6.5         | 1.590076475  | 0.000162 | 0.002663 | kappaTry |
|             |             |             |              | 075      | 094      |          |
| FBgn0085265 | 0.026333333 | 1.453333333 | 5.786331671  | 0.000204 | 0.003229 | CG34236  |
|             |             |             |              | 114      | 626      |          |
| FBgn0050360 | 6.658333333 | 38.16366667 | 2.518966786  | 0.000222 | 0.003447 | Mal-A6   |
|             |             |             |              | 297      | 681      |          |
| FBgn0030929 | 2.748333333 | 7.777333333 | 1.50071858   | 0.000229 | 0.003524 | CG15043  |
|             |             |             |              | 231      | 215      |          |
| FBgn0262007 | 3.191666667 | 14.49033333 | 2.182708891  | 0.000260 | 0.003944 | CG42825  |
|             |             |             |              | 747      | 223      |          |
| FBgn0028996 | 0.149       | 0.417333333 | 1.485887826  | 0.000265 | 0.003998 | onecut   |
|             |             |             |              | 206      | 794      |          |
| FBgn0040723 | 1.837666667 | 5.887       | 1.679657527  | 0.000267 | 0.004025 | CG5011   |
|             |             |             |              | 862      | 919      |          |
| FBgn0066365 | 1.069333333 | 0.454333333 | -1.23488858  | 0.000298 | 0.004379 | dyl      |
|             |             |             |              | 525      | 395      |          |
| FBgn0262006 | 10.71833333 | 5.006333333 | -1.098254331 | 0.000299 | 0.004385 | CG42824  |
|             |             |             |              | 231      | 195      |          |
| FBgn0010038 | 1.731333333 | 4.156       | 1.263312141  | 0.000328 | 0.004723 | GstD2    |
|             |             |             |              | 63       | 408      |          |
| FBgn0032669 | 3.911666667 | 0.938333333 | -2.059611014 | 0.000346 | 0.004935 | CG15155  |
|             |             |             |              | 297      | 011      |          |
| FBgn0069969 | 0.451       | 1.341333333 | 1.572468466  | 0.000366 | 0.005132 | CG40498  |
|             |             |             |              | 22       | 173      |          |
| FBgn0264330 | 12.39766667 | 5.358666667 | -1.210122638 | 0.000374 | 0.005230 | CG43789  |
|             |             |             |              | 345      | 441      |          |
| FBgn0028381 | 1.678333333 | 7.845       | 2.22474417   | 0.000379 | 0.005296 | Decay    |
|             |             |             |              | 82       | 441      |          |
| MSTRG.2986  | 1.503666667 | 0.608       | -1.306341557 | 0.000401 | 0.005512 | --       |
|             |             |             |              | 174      | 431      |          |
| FBgn0033742 | 0.608666667 | 1.453333333 | 1.25564137   | 0.000448 | 0.006055 | Nep110   |
|             |             |             |              | 872      | 693      |          |
| FBgn0030837 | 0.001       | 0.759333333 | 9.568589531  | 0.000451 | 0.006075 | CG8661   |

|             |             |             |              |                 |                 |         |
|-------------|-------------|-------------|--------------|-----------------|-----------------|---------|
|             |             |             |              | 218             | 712             |         |
| FBgn0029835 | 0.236333333 | 0.714666667 | 1.596447373  | 0.000462<br>947 | 0.006191<br>576 | CG5921  |
| FBgn0035886 | 0.001       | 0.637       | 9.315149562  | 0.000473<br>417 | 0.006296<br>445 | Jon66Ci |
| FBgn0267339 | 0.918       | 2.35        | 1.356094698  | 0.000484<br>968 | 0.006389<br>789 | p38c    |
| FBgn0052633 | 0.237333333 | 1.505       | 2.664776841  | 0.000491<br>706 | 0.006460<br>456 | CG32633 |
| FBgn0259194 | 0.744333333 | 0.178333333 | -2.061372455 | 0.000498<br>312 | 0.006522<br>938 | Ir94e   |
| FBgn0085205 | 4.304666667 | 10.61166667 | 1.301677832  | 0.000512<br>514 | 0.006671<br>68  | CG34176 |
| FBgn0031414 | 0.245       | 0.504333333 | 1.041595832  | 0.000515<br>085 | 0.006692<br>783 | eyes    |
| FBgn0265349 | 5.983       | 1.738333333 | -1.783164311 | 0.000569<br>494 | 0.007292<br>208 | Sfp33A4 |
| FBgn0036612 | 0.510666667 | 0.198333333 | -1.364454724 | 0.000653<br>002 | 0.008111<br>031 | CG4998  |
| FBgn0001077 | 0.553       | 1.447       | 1.387713536  | 0.000683<br>872 | 0.008423<br>849 | ftz     |
| FBgn0033297 | 3.674333333 | 11.14733333 | 1.601144212  | 0.000690<br>968 | 0.008492<br>822 | Mal-A8  |
| FBgn0085261 | 1.226333333 | 4.164666667 | 1.763849854  | 0.000746<br>659 | 0.009038<br>193 | CG34232 |
| FBgn0041156 | 0.102       | 0.579       | 2.504994196  | 0.000762<br>078 | 0.009174<br>876 | exex    |
| FBgn0035186 | 0.535       | 1.989       | 1.89443248   | 0.000776<br>293 | 0.009275<br>263 | CG13912 |
| FBgn0263597 | 235.218     | 93.954      | -1.323971977 | 0.000805<br>579 | 0.009559<br>803 | Acp98AB |
| FBgn0031461 | 0.608       | 1.303       | 1.099693855  | 0.000817<br>068 | 0.009663<br>614 | daw     |
| FBgn0014903 | 1.427       | 3.341333333 | 1.227438579  | 0.000835<br>584 | 0.009775<br>324 | CG14630 |
| FBgn0034901 | 4.611       | 1.854       | -1.314438422 | 0.000870<br>669 | 0.010077<br>743 | CG11300 |
| FBgn0038391 | 0.160333333 | 0.791666667 | 2.303818714  | 0.000876<br>191 | 0.010125<br>031 | GATAe   |
| FBgn0259957 | 5.966333333 | 1.937       | -1.623020628 | 0.000894<br>091 | 0.010298<br>111 | CG42467 |
| FBgn0033685 | 1.483       | 0.529       | -1.48717897  | 0.000916<br>726 | 0.010430<br>994 | OSCP1   |
| MSTRG.14489 | 1.628333333 | 3.539       | 1.1199457    | 0.001012        | 0.011277        | --      |

|             |             |             |              |          |          |          |
|-------------|-------------|-------------|--------------|----------|----------|----------|
|             |             |             |              | 718      | 484      |          |
| FBgn0053514 | 1.078666667 | 2.814       | 1.383373222  | 0.001023 | 0.011378 | CG33514  |
|             |             |             |              | 428      | 776      |          |
| FBgn0024184 | 0.042       | 0.331       | 2.978369984  | 0.001048 | 0.011581 | unc-4    |
|             |             |             |              | 232      | 725      |          |
| FBgn0034296 | 3.362       | 39.09233333 | 3.539494069  | 0.001112 | 0.012118 | CG10912  |
|             |             |             |              | 336      | 788      |          |
| FBgn0034553 | 0.047666667 | 0.522666667 | 3.454838507  | 0.001193 | 0.012754 | CG9993   |
|             |             |             |              | 333      | 825      |          |
| FBgn0267252 | 1.684333333 | 3.851333333 | 1.193180315  | 0.001270 | 0.013381 | Ggamma3  |
|             |             |             |              | 025      | 771      | 0A       |
| MSTRG.11564 | 0.206666667 | 0.773333333 | 1.903784685  | 0.001287 | 0.013550 | --       |
|             |             |             |              | 957      | 465      |          |
| FBgn0263656 | 0.001       | 0.806333333 | 9.655232553  | 0.001302 | 0.013636 | CG43647  |
|             |             |             |              | 925      | 698      |          |
| FBgn0035734 | 2.760333333 | 1.34        | -1.042609494 | 0.001329 | 0.013850 | CG14823  |
|             |             |             |              | 202      | 034      |          |
| FBgn0035290 | 0.313666667 | 0.876333333 | 1.482247514  | 0.001357 | 0.014077 | dsb      |
|             |             |             |              | 001      | 258      |          |
| FBgn0004589 | 4.332666667 | 1.654666667 | -1.388714633 | 0.001403 | 0.014497 | Eig71Eb  |
|             |             |             |              | 712      | 823      |          |
| FBgn0036422 | 1.989       | 5.074333333 | 1.351175017  | 0.001450 | 0.014860 | CG3868   |
|             |             |             |              | 931      | 989      |          |
| FBgn0039945 | 0.306333333 | 0.709666667 | 1.212039183  | 0.001451 | 0.014860 | CG17159  |
|             |             |             |              | 524      | 989      |          |
| MSTRG.7863  | 1.601333333 | 0.613333333 | -1.384530385 | 0.001468 | 0.014998 | --       |
|             |             |             |              | 167      | 71       |          |
| FBgn0039085 | 0.562666667 | 1.401666667 | 1.316790896  | 0.001490 | 0.015180 | Ugt303B3 |
|             |             |             |              | 275      | 561      |          |
| FBgn0262003 | 3.645666667 | 1.115       | -1.709138948 | 0.001491 | 0.015181 | CG42821  |
|             |             |             |              | 49       | 97       |          |
| MSTRG.7966  | 0.463666667 | 0.083       | -2.481904772 | 0.001548 | 0.015580 | --       |
|             |             |             |              | 314      | 391      |          |
| FBgn0022740 | 0.653       | 1.955333333 | 1.582259673  | 0.001555 | 0.015618 | HLH54F   |
|             |             |             |              | 262      | 118      |          |
| MSTRG.3037  | 0.209       | 1.043666667 | 2.32008616   | 0.001736 | 0.017074 | --       |
|             |             |             |              | 807      | 968      |          |
| FBgn0010223 | 1.056333333 | 2.115333333 | 1.001819862  | 0.001835 | 0.017899 | Galphaf  |
|             |             |             |              | 524      | 568      |          |
| FBgn0040349 | 2.759333333 | 5.941333333 | 1.106466984  | 0.001934 | 0.018664 | CG3699   |
|             |             |             |              | 247      | 618      |          |
| FBgn0052499 | 1.154       | 0.472       | -1.289784459 | 0.002000 | 0.019170 | Cda4     |
|             |             |             |              | 27       | 502      |          |
| MSTRG.5198  | 2.031       | 0.998       | -1.025078519 | 0.002041 | 0.019482 | --       |

|             |             |              |              |          |          |          |  |
|-------------|-------------|--------------|--------------|----------|----------|----------|--|
|             |             |              |              |          | 121      | 55       |  |
| FBgn0031935 | 0.961666667 | 1.924        | 1.000499981  | 0.002105 | 0.019924 | CG13793  |  |
|             |             |              |              | 773      | 284      |          |  |
| FBgn0015039 | 1.879666667 | 8.322666667  | 2.146569014  | 0.002290 | 0.021329 | Cyp9b2   |  |
|             |             |              |              | 634      | 825      |          |  |
| FBgn0038613 | 0.013       | 0.269333333  | 4.372809264  | 0.002345 | 0.021625 | Vha100-4 |  |
|             |             |              |              | 429      | 804      |          |  |
| FBgn0051104 | 0.326666667 | 1.327666667  | 2.023001825  | 0.002384 | 0.021882 | CG31104  |  |
|             |             |              |              | 139      | 549      |          |  |
| FBgn0050043 | 0.092333333 | 0.518        | 2.488028622  | 0.002493 | 0.022691 | CG30043  |  |
|             |             |              |              | 169      | 215      |          |  |
| FBgn0032211 | 1.343333333 | 0.605333333  | -1.150015636 | 0.002500 | 0.022729 | CG13138  |  |
|             |             |              |              | 637      | 843      |          |  |
| FBgn0033582 | 0.974       | 2.562666667  | 1.395652158  | 0.002518 | 0.022825 | CG9084   |  |
|             |             |              |              | 203      | 788      |          |  |
| MSTRG.14469 | 1.368333333 | 2.891666667  | 1.079481536  | 0.002598 | 0.023455 | --       |  |
|             |             |              |              | 776      | 534      |          |  |
| FBgn0085232 | 0.068       | 1.155333333  | 4.086630597  | 0.002699 | 0.024075 | CG34203  |  |
|             |             |              |              | 131      | 874      |          |  |
| MSTRG.7973  | 2.395333333 | 0.968666667  | -1.306154232 | 0.002704 | 0.024080 | --       |  |
|             |             |              |              | 849      | 079      |          |  |
| FBgn0034045 | 0.285666667 | 0.764333333  | 1.419869245  | 0.002752 | 0.024388 | CG8249   |  |
|             |             |              |              | 282      | 225      |          |  |
| FBgn0028940 | 0.921       | 2.261666667  | 1.296113253  | 0.002863 | 0.025124 | Cyp28a5  |  |
|             |             |              |              | 896      | 584      |          |  |
| FBgn0032235 | 2.585333333 | 8.822        | 1.770755458  | 0.002892 | 0.025283 | CG5096   |  |
|             |             |              |              | 813      | 868      |          |  |
| FBgn0033668 | 0.533333333 | 0.185        | -1.527512229 | 0.003188 | 0.027311 | exp      |  |
|             |             |              |              | 727      | 469      |          |  |
| FBgn0053346 | 0.114       | 0.939        | 3.042091333  | 0.003298 | 0.027950 | -        |  |
|             |             |              |              | 982      | 147      |          |  |
| FBgn0264776 | 2.545333333 | 5.806666667  | 1.189855616  | 0.003504 | 0.029220 | CG44014  |  |
|             |             |              |              | 876      | 428      |          |  |
| FBgn0003861 | 0.215333333 | 0.538666667  | 1.322821128  | 0.003571 | 0.029671 | trp      |  |
|             |             |              |              | 575      | 218      |          |  |
| FBgn0053816 | 0.114       | 0.869        | 2.930322353  | 0.003578 | 0.029714 | His1:CG3 |  |
|             |             |              |              | 864      | 267      | 3816     |  |
| FBgn0085227 | 1.255       | 3.505333333  | 1.481864277  | 0.003645 | 0.030198 | CG34198  |  |
|             |             |              |              | 78       | 71       |          |  |
| FBgn0003863 | 7.372666667 | 60.005333333 | 3.024832298  | 0.003657 | 0.030260 | alphaTry |  |
|             |             |              |              | 591      | 988      |          |  |
| FBgn0036320 | 0.855       | 2.871666667  | 1.747891971  | 0.003691 | 0.030487 | CG10943  |  |
|             |             |              |              | 416      | 157      |          |  |
| MSTRG.10295 | 1.483666667 | 0.478666667  | -1.632073752 | 0.004025 | 0.032613 | --       |  |

|             |             |             |              |          |          |            |
|-------------|-------------|-------------|--------------|----------|----------|------------|
|             |             |             |              | 743      | 284      |            |
| FBgn0034318 | 0.281       | 1.755666667 | 2.643376923  | 0.004047 | 0.032719 | CG14500    |
|             |             |             |              | 546      | 215      |            |
| FBgn0032433 | 0.841333333 | 1.710666667 | 1.02380926   | 0.004126 | 0.033166 | Oatp33Ea   |
|             |             |             |              | 104      | 923      |            |
| FBgn0053301 | 1.009333333 | 2.403666667 | 1.251834137  | 0.004299 | 0.034268 | -          |
|             |             |             |              | 941      | 272      |            |
| FBgn0053533 | 1.567666667 | 4.188666667 | 1.417872248  | 0.004476 | 0.035259 | lectin-37D |
|             |             |             |              | 79       | 101      | b          |
| FBgn0266099 | 0.956333333 | 2.601666667 | 1.443850664  | 0.004575 | 0.035803 | CG44836    |
|             |             |             |              | 541      | 256      |            |
| FBgn0039319 | 0.907333333 | 2.013333333 | 1.149881483  | 0.004659 | 0.036332 | CG13659    |
|             |             |             |              | 482      | 623      |            |
| FBgn0267428 | 0.680666667 | 0.262666667 | -1.373715331 | 0.004680 | 0.036438 | DIP-lamb   |
|             |             |             |              | 835      | 662      | da         |
| FBgn0034622 | 0.337666667 | 0.078       | -2.114053739 | 0.004890 | 0.037595 | BBS9       |
|             |             |             |              | 817      | 823      |            |
| FBgn0036996 | 3.413333333 | 1.432       | -1.253149817 | 0.005045 | 0.038452 | mag        |
|             |             |             |              | 894      | 44       |            |
| MSTRG.3040  | 1.182       | 0.454666667 | -1.378348892 | 0.005075 | 0.038544 | --         |
|             |             |             |              | 249      | 295      |            |
| FBgn0034005 | 0.514333333 | 1.042       | 1.018579716  | 0.005087 | 0.038582 | ItgaPS4    |
|             |             |             |              | 641      | 873      |            |
| FBgn0264775 | 0.382       | 4.019       | 3.395192034  | 0.005136 | 0.038848 | CG44013    |
|             |             |             |              | 461      | 619      |            |
| MSTRG.14528 | 2.074666667 | 0.718333333 | -1.530154191 | 0.005340 | 0.039952 | Clbn       |
|             |             |             |              | 037      | 543      |            |
| FBgn0265579 | 5.900333333 | 2.73        | -1.111895509 | 0.005526 | 0.040938 | CG44406    |
|             |             |             |              | 024      | 462      |            |
| FBgn0002578 | 0.097       | 0.967666667 | 3.318453514  | 0.005611 | 0.041357 | Kaz-m1     |
|             |             |             |              | 733      | 648      |            |
| FBgn0036411 | 0.029666667 | 0.277333333 | 3.224706287  | 0.005677 | 0.041620 | Sox21a     |
|             |             |             |              | 069      | 032      |            |
| FBgn0040252 | 0.189666667 | 0.696       | 1.875621154  | 0.005702 | 0.041765 | Ugt303A1   |
|             |             |             |              | 896      | 933      |            |
| FBgn0040609 | 2.745666667 | 5.654666667 | 1.042285494  | 0.005962 | 0.043128 | CG3348     |
|             |             |             |              | 92       | 554      |            |
| FBgn0260393 | 1.393       | 0.591666667 | -1.235338734 | 0.006199 | 0.044389 | CG17147    |
|             |             |             |              | 693      | 677      |            |
| MSTRG.14398 | 5.182666667 | 2.390333333 | -1.11648279  | 0.006488 | 0.045919 | --         |
|             |             |             |              | 242      | 297      |            |
| FBgn0262588 | 1.532       | 0.502       | -1.609657028 | 0.006615 | 0.046631 | CG43125    |
|             |             |             |              | 302      | 262      |            |
| FBgn0053511 | 0.284333333 | 0.012666667 | -4.488474418 | 0.006667 | 0.046906 | -          |



|             |             |              |              |          |          |          |
|-------------|-------------|--------------|--------------|----------|----------|----------|
|             |             |              |              | 68       | 661      |          |
| FBgn0052115 | 0.596       | 1.365666667  | 1.196221156  | 0.006766 | 0.047340 | CG32115  |
|             |             |              |              | 273      | 408      |          |
| FBgn0264296 | 0.158       | 1.385        | 3.131889513  | 0.006865 | 0.047936 | CG43774  |
|             |             |              |              | 124      | 856      |          |
| FBgn0031432 | 0.378333333 | 1.025666667  | 1.438832146  | 0.006928 | 0.048280 | Cyp309a1 |
|             |             |              |              | 061      | 676      |          |
| FBgn0261575 | 3.608666667 | 20.730666667 | 2.52222872   | 0.006967 | 0.048504 | tobi     |
|             |             |              |              | 057      | 479      |          |
| FBgn0032315 | 4.333       | 1.573333333  | -1.461541878 | 0.007049 | 0.048885 | CG14069  |
|             |             |              |              | 466      | 08       |          |
| FBgn0010044 | 0.195       | 1.106666667  | 2.504674712  | 0.007139 | 0.049434 | GstD8    |
|             |             |              |              | 218      | 525      |          |
